# Supplementary material for: Changes in glycoprotein expression between primary breast tumour and synchronous lymph node metastases or asynchronous distant metastases
Source: PubMed Central journal article supplement (PMC4436114; doi:10.1186/s12014-015-9084-7), 2015-05-12

S1(a)

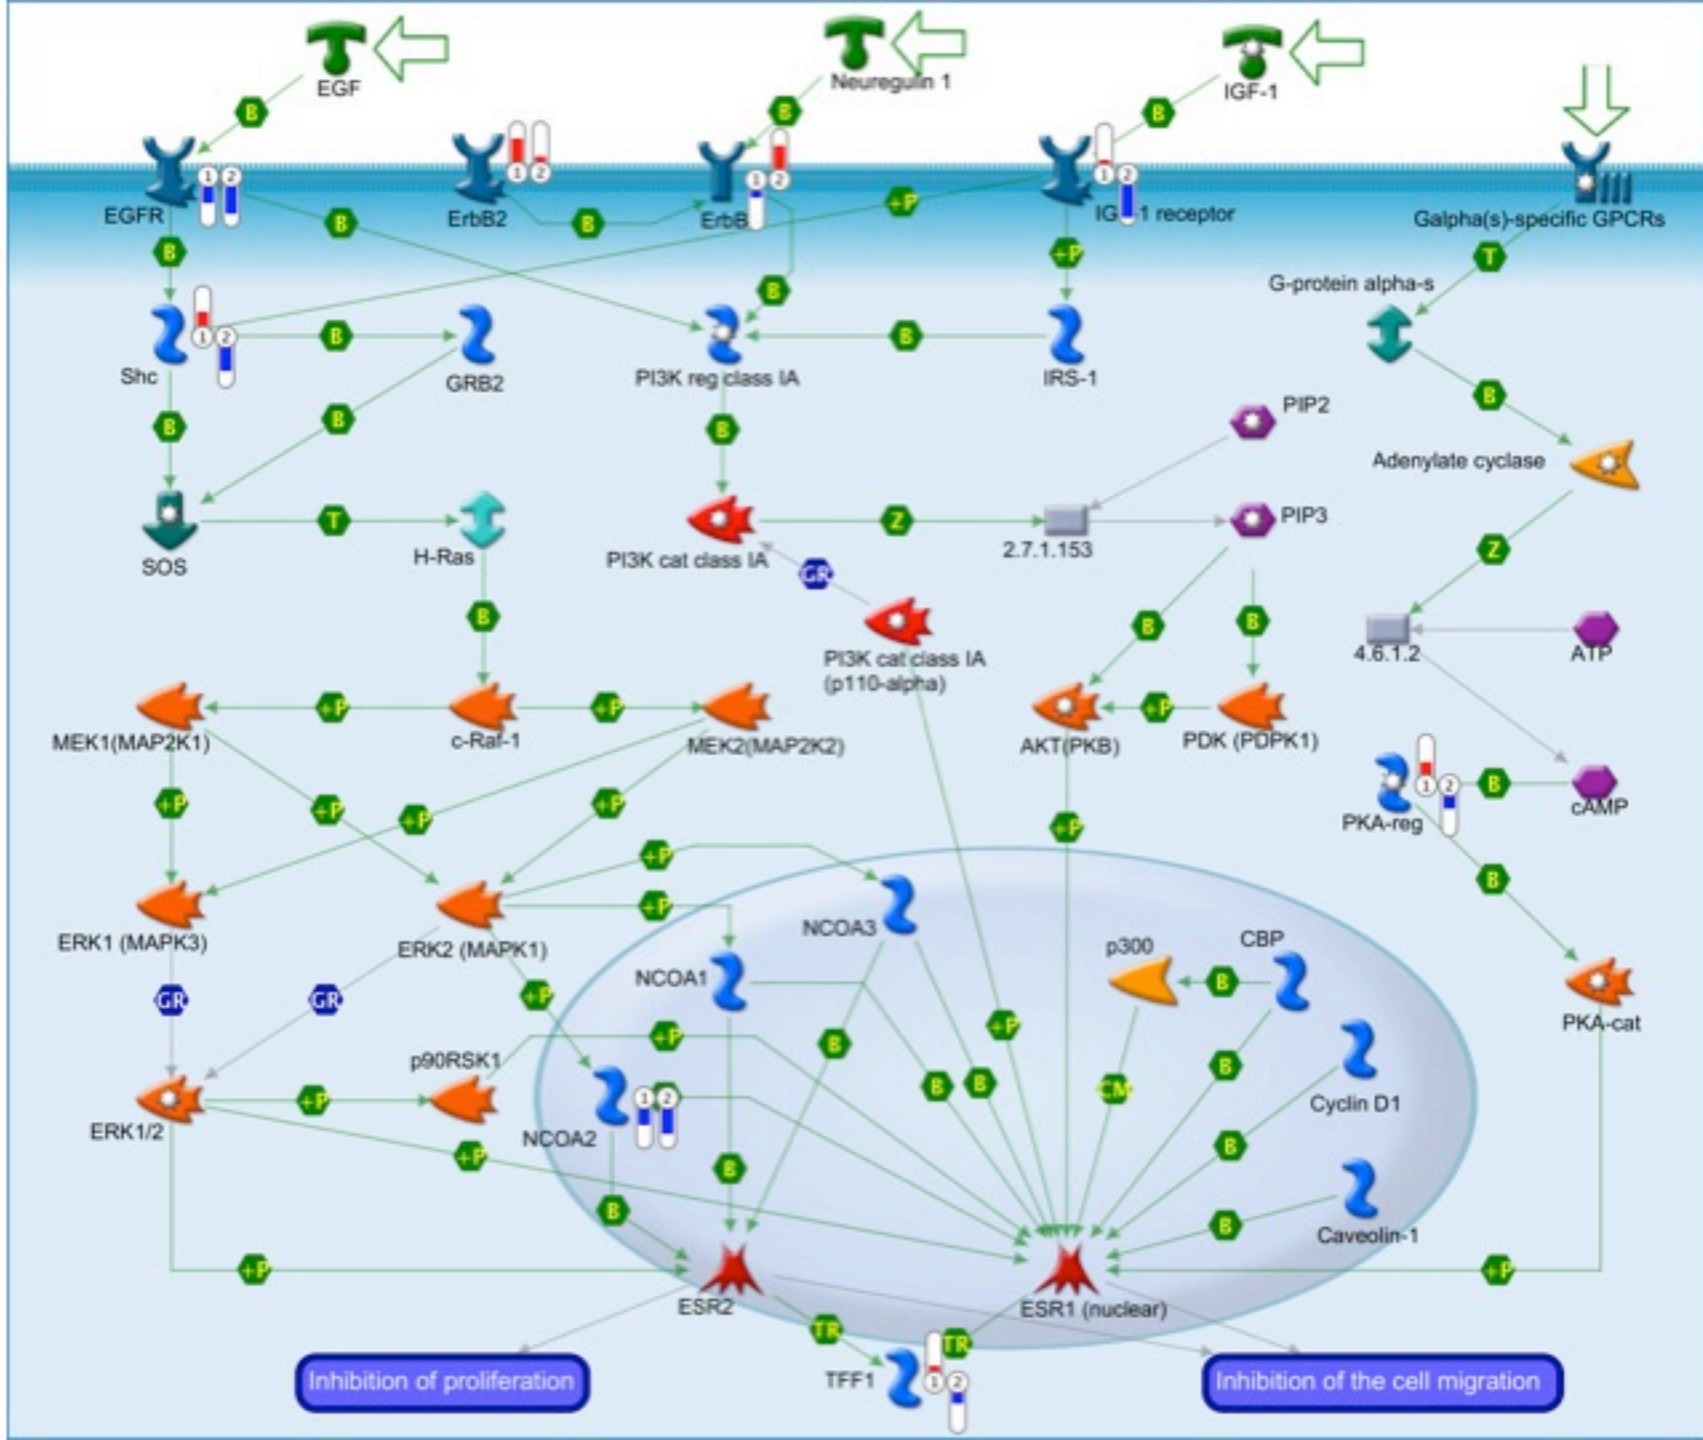

S1(b)

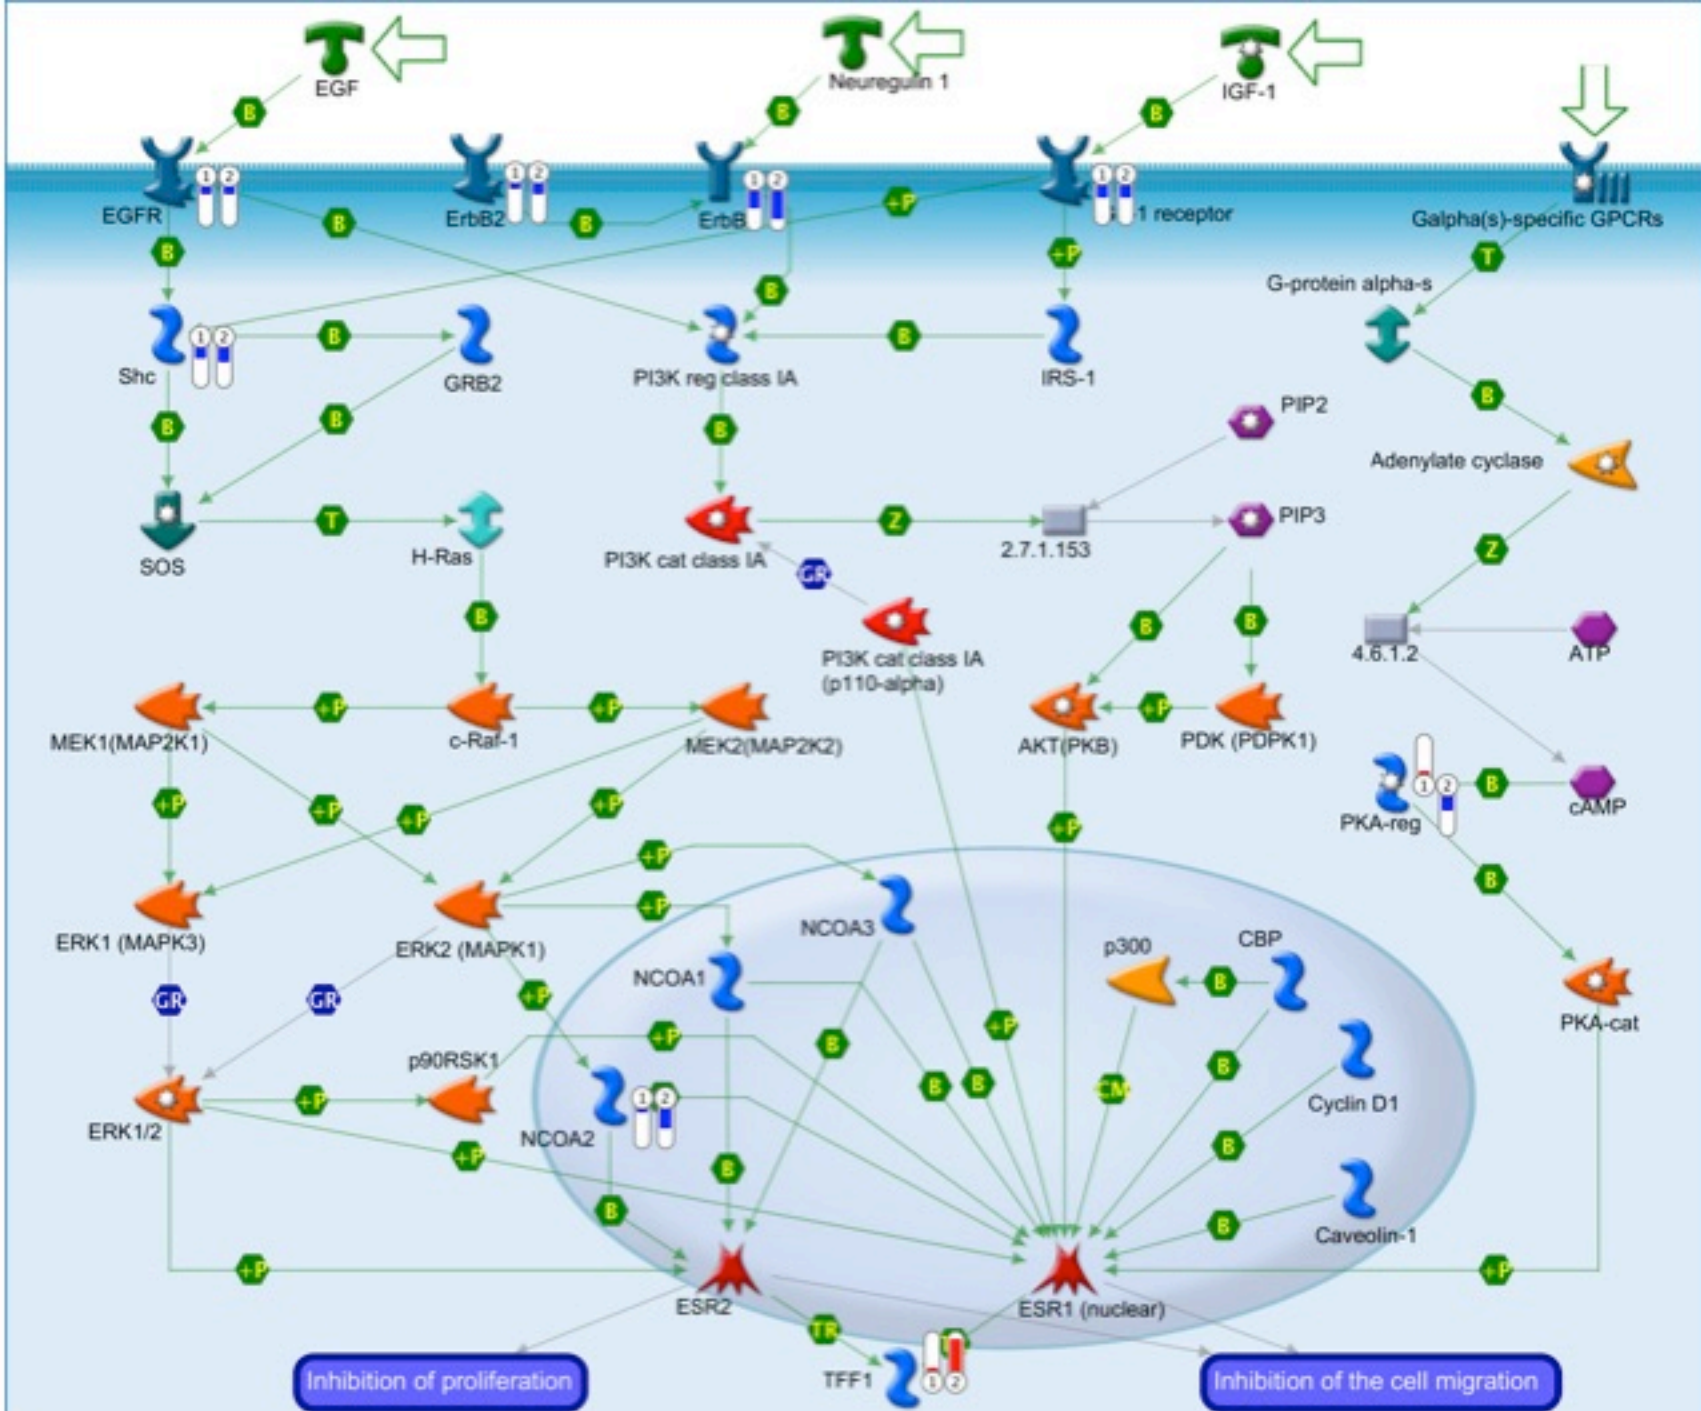

S1(c)

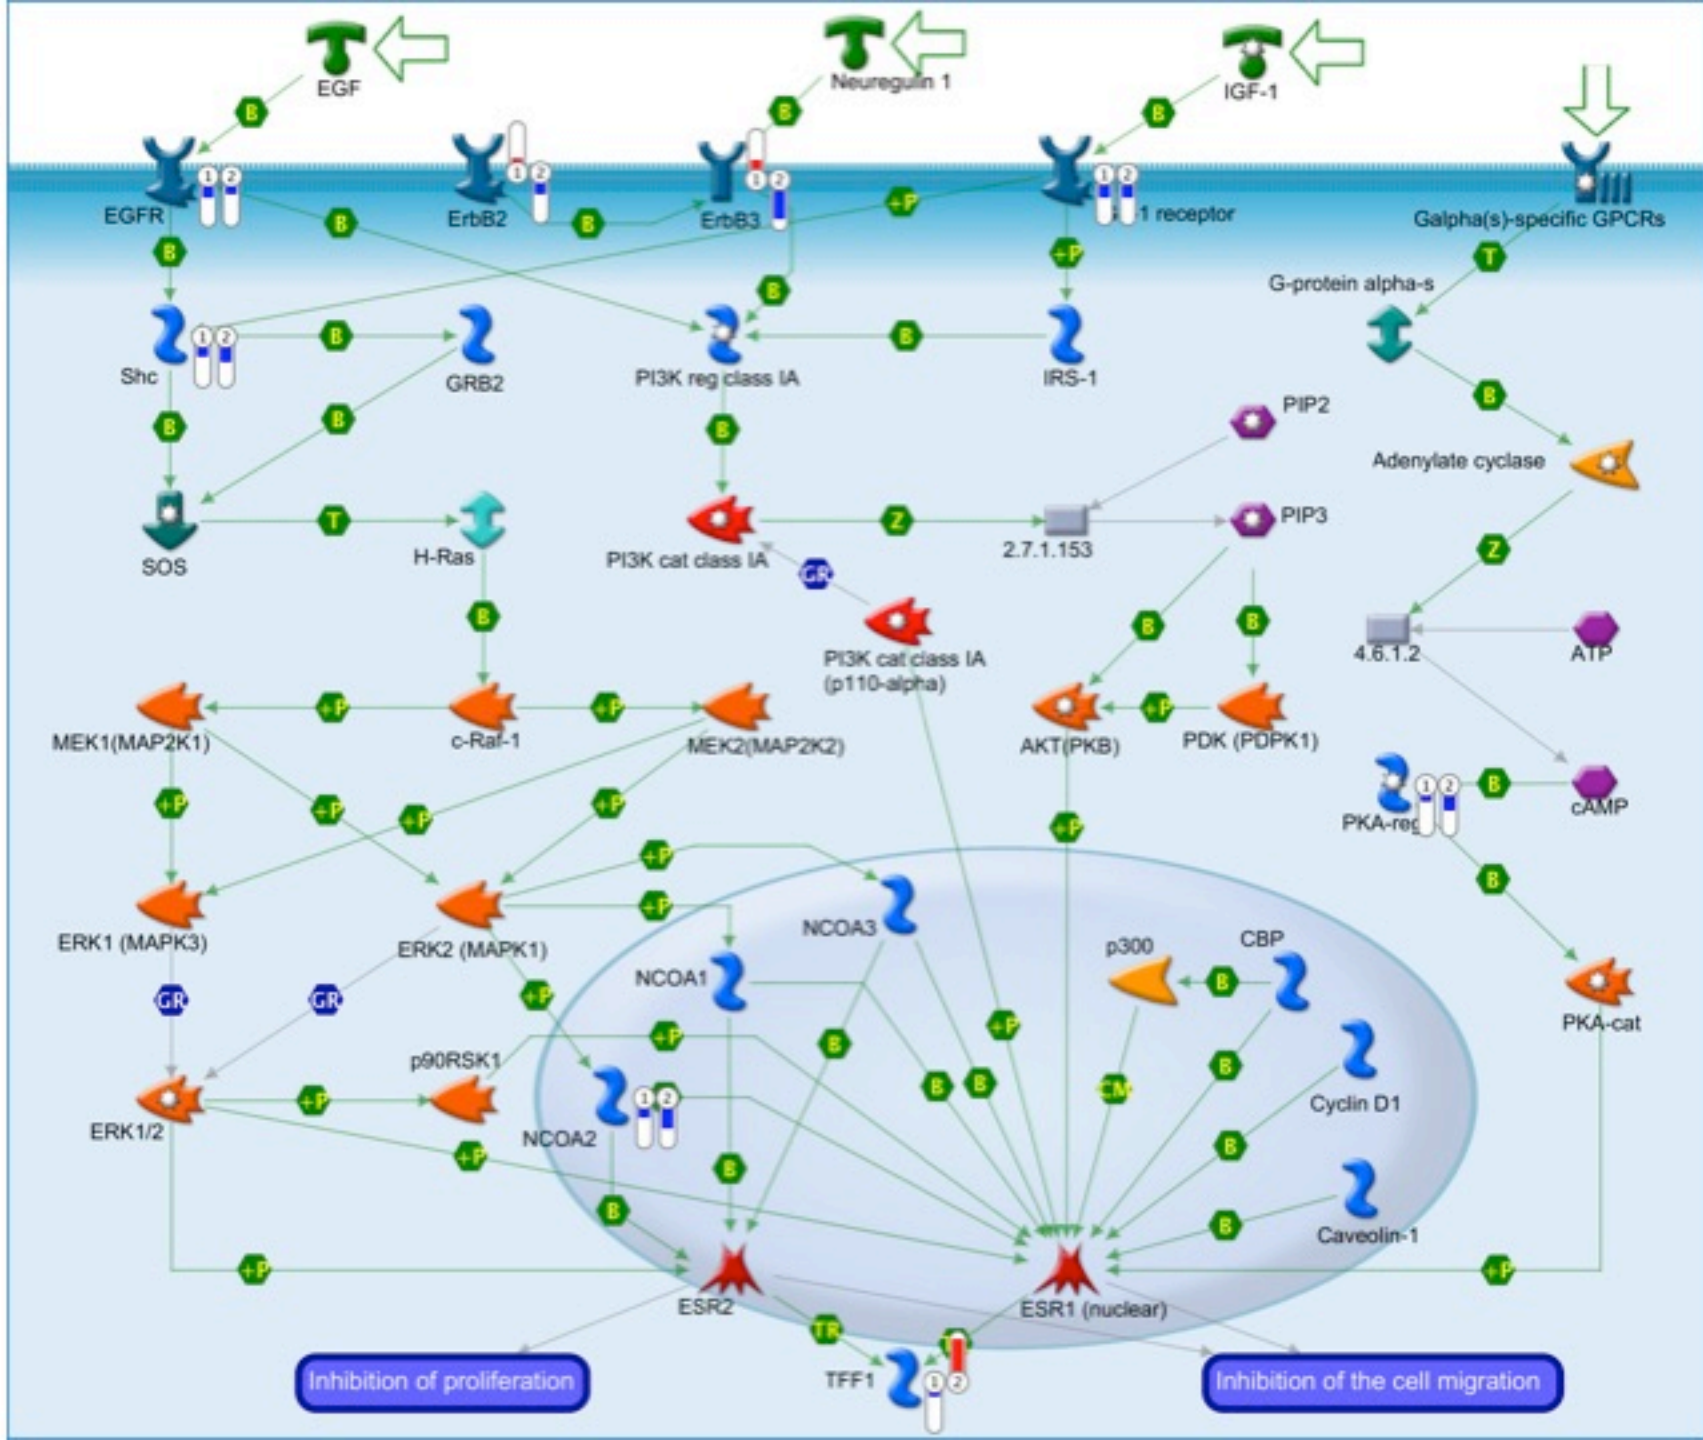

S1(d)

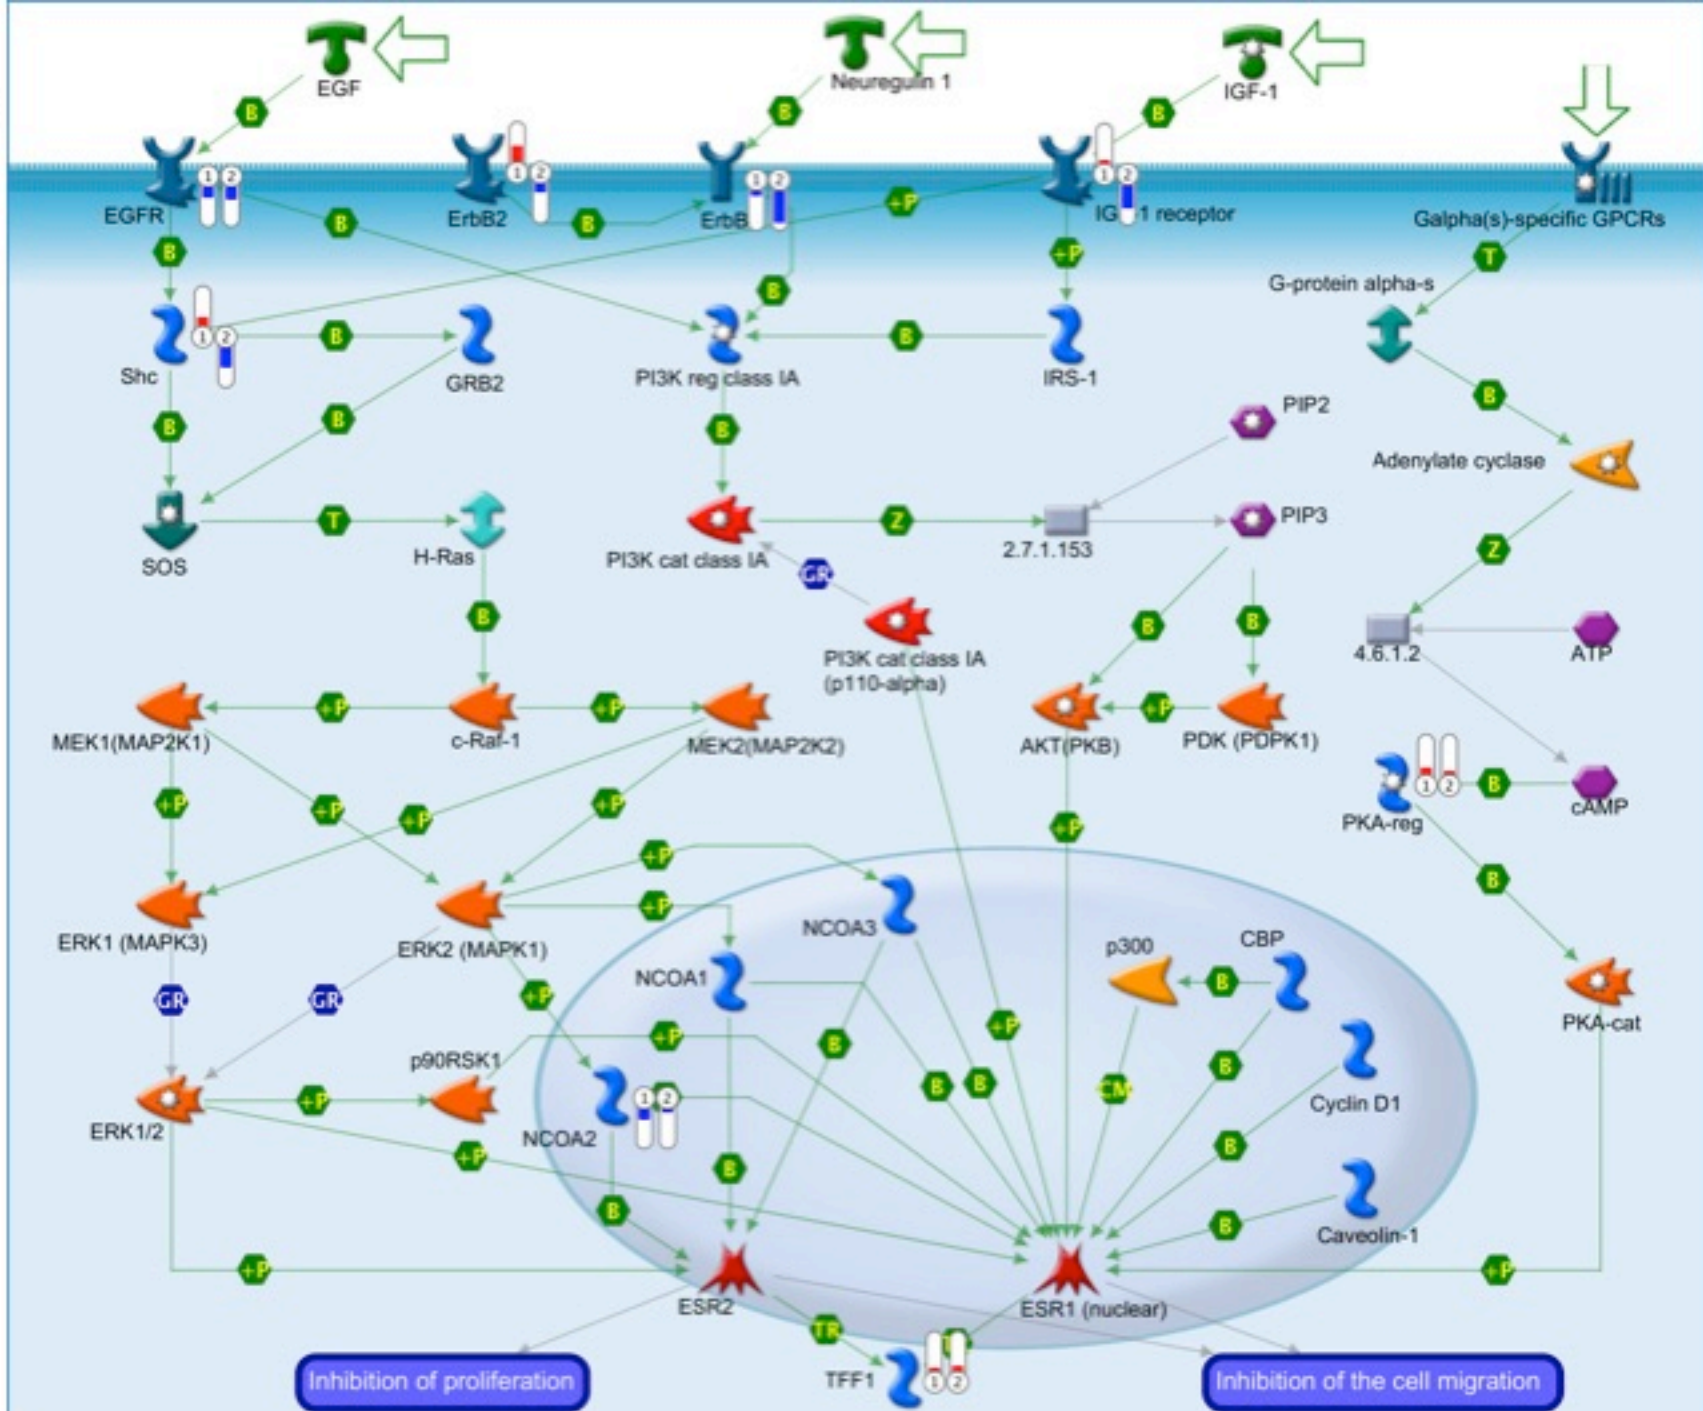

Supplement: 12014_2015_9084_MOESM1_ESM.pdf [file 12014_2015_9084_MOESM1_ESM.pdf]
